# Supplementary material
Source: MDPI journal article supplement (https://www.mdpi.com/2073-4352/11/6/659)
Supplement: s1 [file s1]

# Supplementary Information for Visible Light Induced Reactivity of Plasmonic Gold Nanoparticles Incorporated into TiO<sub>2</sub> Matrix towards 2- Chloroethyl Ethyl Sulfide

Wesley Gordon <sup>1</sup>, Alex Balboa <sup>1</sup>, Spencer Giles <sup>2</sup>, Albert Epshteyn <sup>2</sup>, Oscar Ávalos-Ovando <sup>3</sup>, Alexander Govorov <sup>3</sup>, Monica McEntee <sup>1,\*</sup>, and Olga Baturina <sup>2,\*</sup>

<sup>1</sup> U.S. Army DEVCOM Chemical Biological Center, Aberdeen Proving Ground, Aberdeen, MD 21010, USA; wesley.o.gordon.civ@mail.mil (W.G.); alex.balboa.civ@mail.mil (A.B.)

<sup>2</sup> Chemistry Division, Naval Research Laboratory, Washington DC 20375, USA; spencer.giles@nrl.navy.mil (S.G.); albert.epshteyn@nrl.navy.mil (A.E.)

<sup>3</sup> Department of Physics and Astronomy, Ohio University, Athens, OH 45701, USA; oa322219@ohio.edu (O.Á.-O.); govorov@ohio.edu (A.G.)

\* Correspondence: monica.l.mcentee.civ@mail.mil (M.M.); olga.baturina@nrl.navy.mil (O.B.)

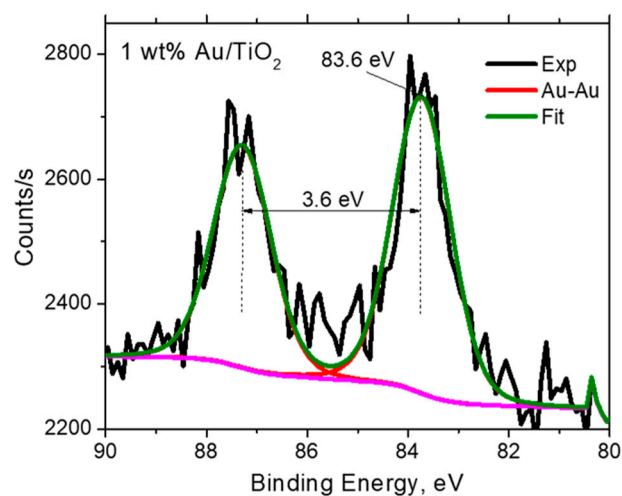

**Figure 1.** Au4f high resolution spectrum collected from 1 wt% Au/TiO<sub>2</sub> photocatalyst and fitted as a 4f<sub>7/2</sub> and 4f<sub>5/2</sub> doublet.

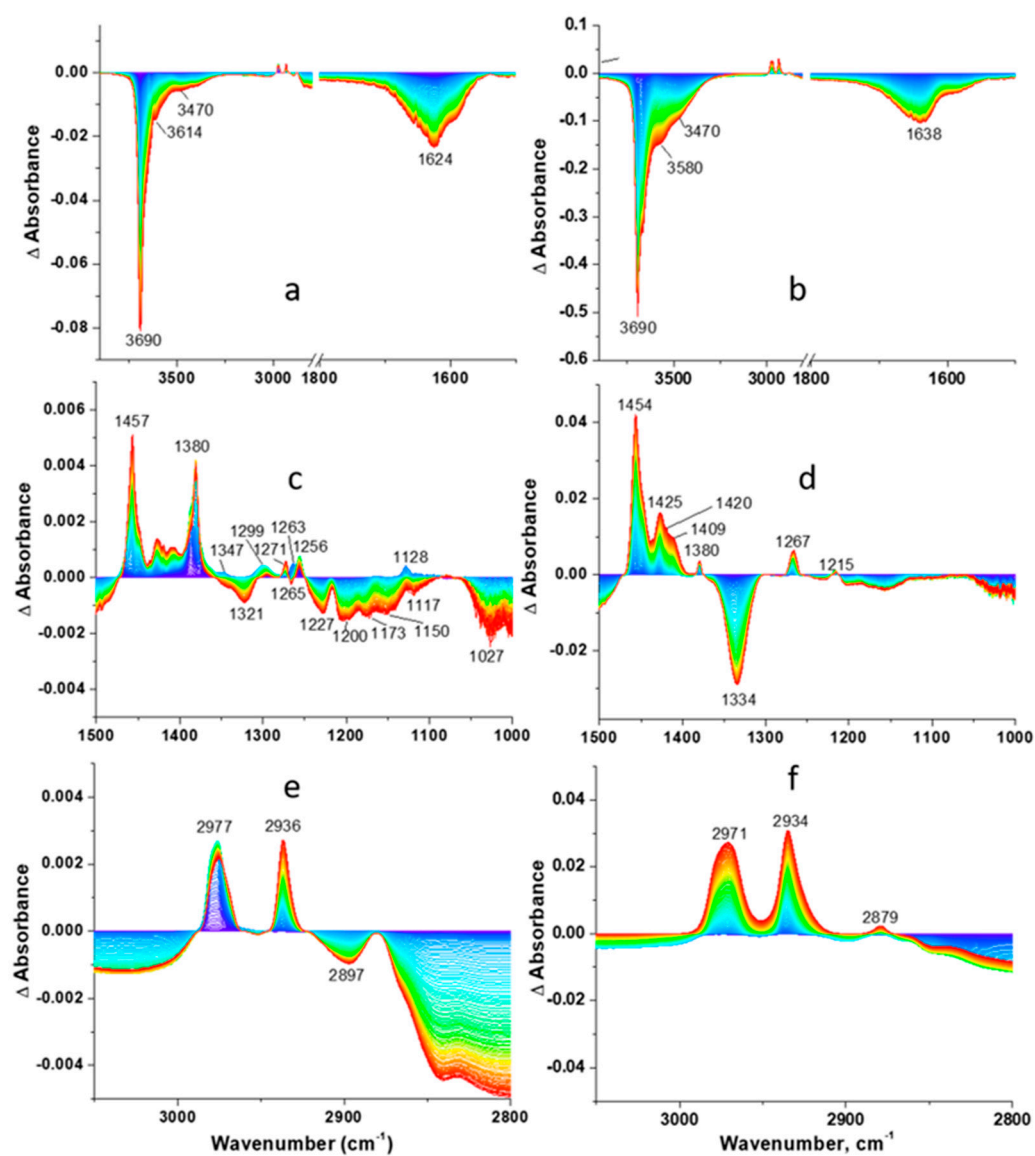

**Figure 2.** DRIFTS difference spectra of (a,c,e) Au/TiO<sub>2</sub> and (b, d, f) TiO<sub>2</sub> photocatalysts recorded during 2-CEES dosing in aerobic conditions in the dark. (a, b) – OH, (c, d) – fingerprint, and (e, f) aliphatic regions.

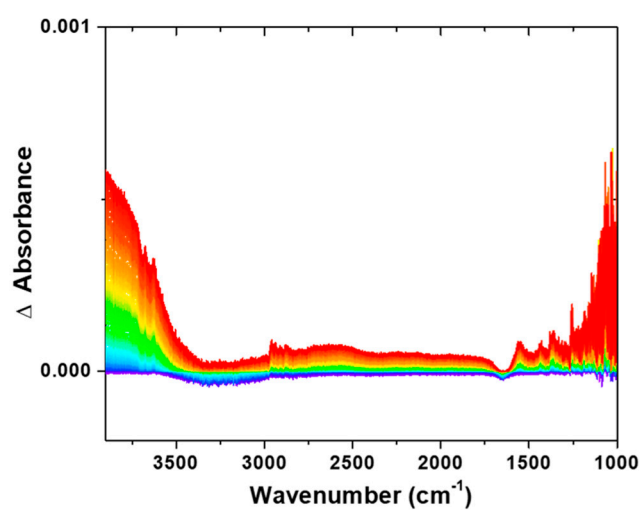

**Figure 3.** DRIFTS difference spectra of  $\text{Au/TiO}_2$  photocatalyst collected under visible excitation in aerobic conditions following CEES dosing and air purge.
